# Supplementary material
Source: PubMed Central journal article supplement (PMC8666797)
Supplement: Supp_TableS1.pdf [file Supp_TableS1.pdf]

## Supplementary Data

SUPPLEMENTARY TABLE S1. INTERCORRELATIONS OF FACTOR AND SUBSCALE SCORES FOR AYA

|                                         | <i>1</i> | <i>2</i> | <i>3</i> | <i>4</i> | <i>5</i> | <i>6</i> | <i>7</i> |
|-----------------------------------------|----------|----------|----------|----------|----------|----------|----------|
| 1. Factor 1 (Trust/mistrust)            | —        |          |          |          |          |          |          |
| 2. Factor 2 (Barriers/costs)            | 0.08     | —        |          |          |          |          |          |
| 3. Factor 3 (Support for participation) | 0.23**   | -0.09    | —        |          |          |          |          |
| 4. Factor 4 (Incentives)                | 0.22*    | 0.21*    | 0.13     | —        |          |          |          |
| 5. Perceived benefits                   | 0.73**   | 0.11     | 0.65**   | 0.54**   | —        |          |          |
| 6. Perceived barriers                   | -0.19*   | 0.92**   | -0.16    | 0.22*    | -0.01    | —        |          |
| 7. Decision balance                     | 0.65**   | -0.57**  | 0.58**   | 0.22*    | 0.71**   | -0.71**  | —        |

\* $p < 0.05$ ; \*\* $p < 0.01$ .

AYA, adolescent and young adults.
