# Supplementary material
Source: PubMed Central journal article supplement (PMC8666797)
Supplement: Supp_TableS2.pdf [file Supp_TableS2.pdf]

SUPPLEMENTARY TABLE S2. INTERCORRELATIONS OF FACTOR AND SUBSCALE SCORES FOR CAREGIVERS

|                                         | 1      | 2       | 3       | 4       | 5      | 6       | 7 |
|-----------------------------------------|--------|---------|---------|---------|--------|---------|---|
| 1. Factor 1 (Access/trust)              | —      |         |         |         |        |         |   |
| 2. Factor 2 (Mistrust/costs)            | -0.10  | —       |         |         |        |         |   |
| 3. Factor 3 (Support for participation) | 0.24*  | -0.26*  | —       |         |        |         |   |
| 4. Factor 4 (Risks for AYA)             | -0.07  | 0.21*   | -0.15   | —       |        |         |   |
| 5. Perceived benefits                   | 0.74** | -0.02   | 0.68**  | -0.08   | —      |         |   |
| 6. Perceived barriers                   | -0.08  | 0.78**  | -0.29** | 0.59**  | -0.14  | —       |   |
| 7. Decision balance                     | 0.55** | -0.53** | 0.64**  | -0.44** | 0.75** | -0.75** | — |

\* $p < 0.05$ ; \*\* $p < 0.01$ .
